# Supplementary material for: Mapping the Alzheimer’s Disease Cooperative Study-Activities of Daily Living Inventory to the Health Utility Index Mark III
Source: Springer Nature journal article supplement (doi:10.1007/s11136-018-1991-4), 2018-09-01
Supplement: MOESM1 [file 16091436]

**Online Supplementary Material S1**

Mean (SD) of ADCS-ADL, HUI3 and MMSE by disease severity

| Severity | ACDS-ADL | HUI3 | MMSE |
| --- | --- | --- | --- |
| Mild | 55.6 (15.2) | 0.568 (0.261) | 20.8 (4.7) |
| Moderate | 33.6 (19.7) | 0.333 (0.303) | 12.0 (4.5) |
| Severe | 16.4 (18.3) | 0.012 (0.232) | 8.2 (3.5) |
| P-value (ANOVA) | <0.001 | <0.001 | <0.001 |
